# Supplementary material for: Assessing the co-variability of DNA methylation across peripheral cells and tissues: Implications for the interpretation of findings in epigenetic epidemiology
Source: PubMed Central journal article supplement (PMC8011804; doi:10.1371/journal.pgen.1009443), 2021-03-19

**Figure S2. Density plot of DNA methylation levels across the 784,726 autosomal DNAm sites included in our analysis for each sample type.** Shown is the mean level of DNAm at each site across all individuals.

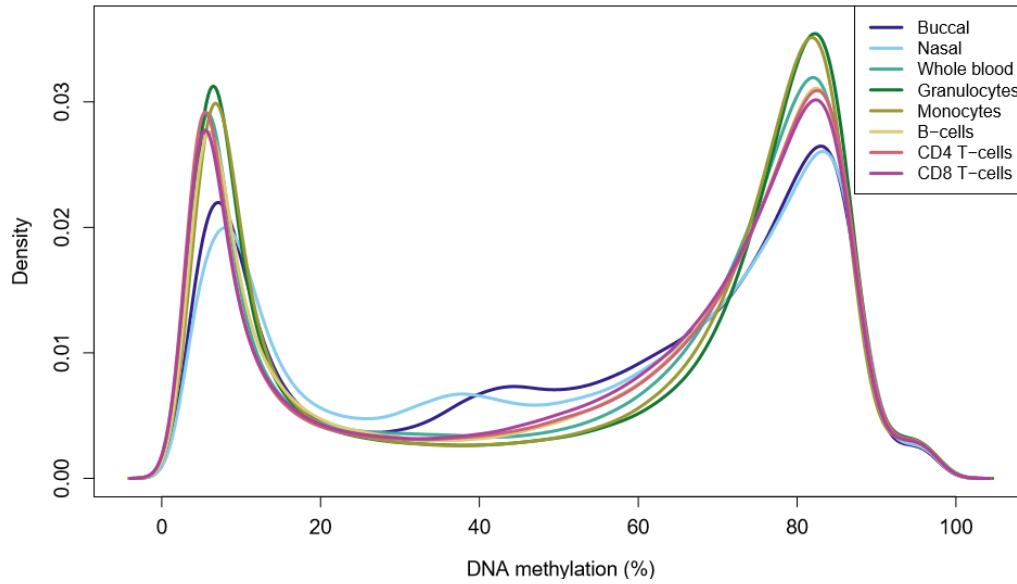

Supplement: pgen.1009443.s002.pdf [file pgen.1009443.s002.pdf]
