# Supplementary material for: Assessing the co-variability of DNA methylation across peripheral cells and tissues: Implications for the interpretation of findings in epigenetic epidemiology
Source: PubMed Central journal article supplement (PMC8011804; doi:10.1371/journal.pgen.1009443), 2021-03-19

**Figure S4. Histogram of the number of sample types in which each DMP is differentially methylated compared to whole blood.** Taking all sites identified as having a significantly different level of DNA methylation compared to whole blood in at least one sample type ( $n = 611,070$ , ANOVA  $P < 9 \times 10^{-8}$ ) we counted the number each of individual sample types characterized by differential DNAm ( $P < 0.05$ ).

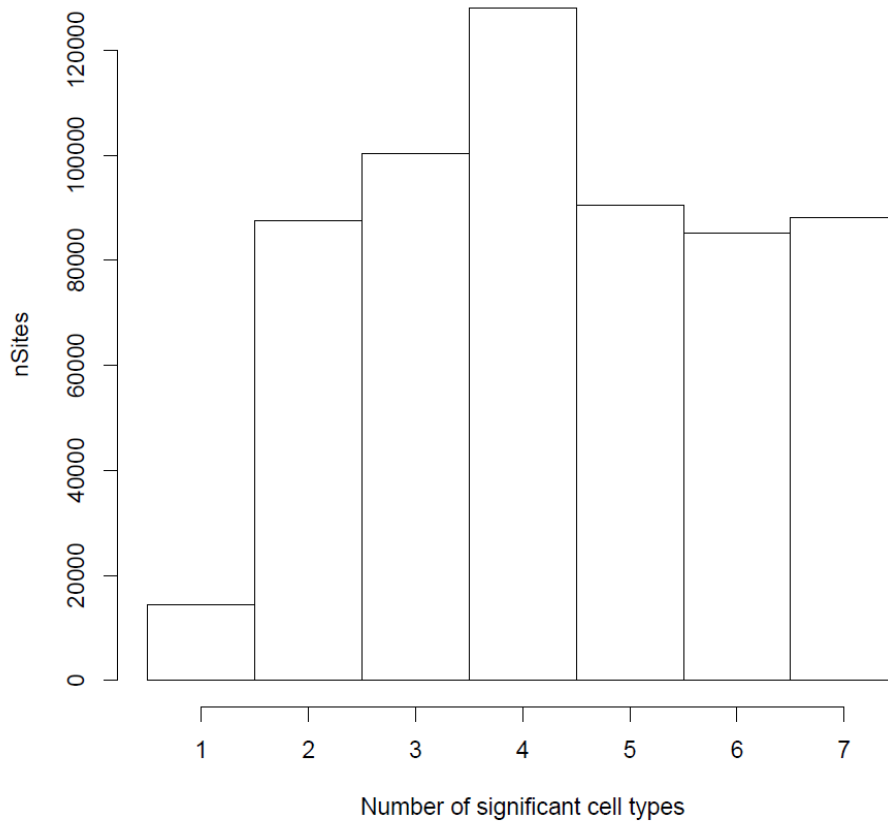

Supplement: pgen.1009443.s004.pdf [file pgen.1009443.s004.pdf]
