# Supplementary material for: Assessing the co-variability of DNA methylation across peripheral cells and tissues: Implications for the interpretation of findings in epigenetic epidemiology
Source: PubMed Central journal article supplement (PMC8011804; doi:10.1371/journal.pgen.1009443), 2021-03-19

**Figure S8. Scatterplot comparing the site-specific variance in DNA methylation between different sample-types.** Shown is the standard deviation in DNA methylation for all autosomal DNAm sites included in our analysis for each pairwise combination of sample types.

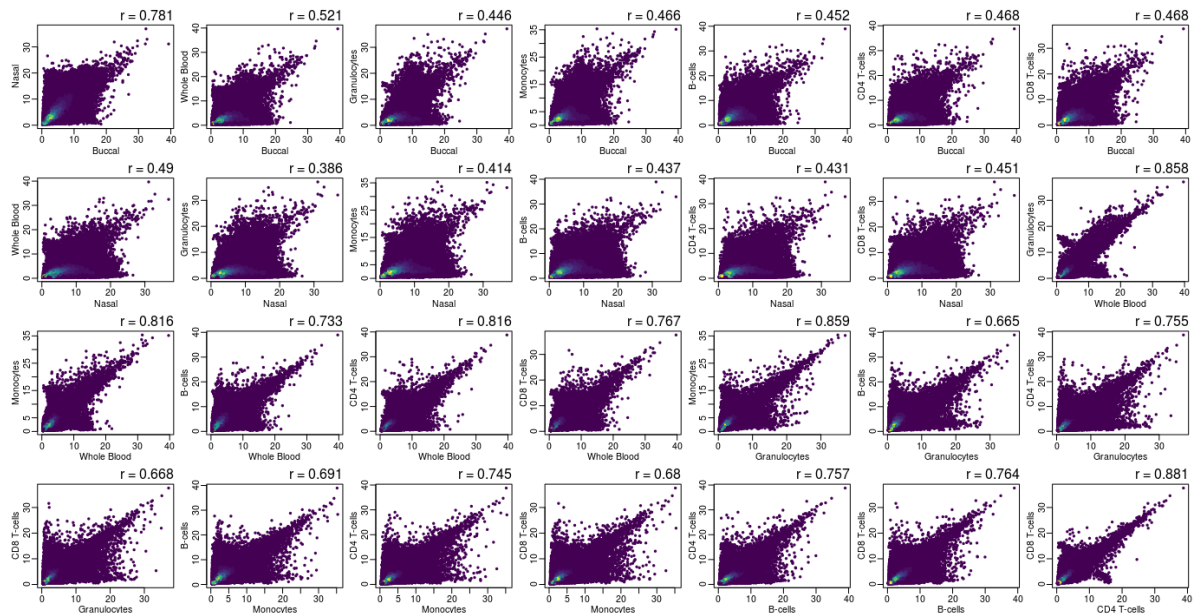

Supplement: pgen.1009443.s008.pdf [file pgen.1009443.s008.pdf]
