# Supplementary material for: Assessing the co-variability of DNA methylation across peripheral cells and tissues: Implications for the interpretation of findings in epigenetic epidemiology
Source: PubMed Central journal article supplement (PMC8011804; doi:10.1371/journal.pgen.1009443), 2021-03-19

**Figure S10. Scatterplot of the site-specific variance in DNA methylation between different sample types across DNAm sites with significantly different levels of variation (n = 194, 247). Above each plot is the Pearson correlation coefficient.**

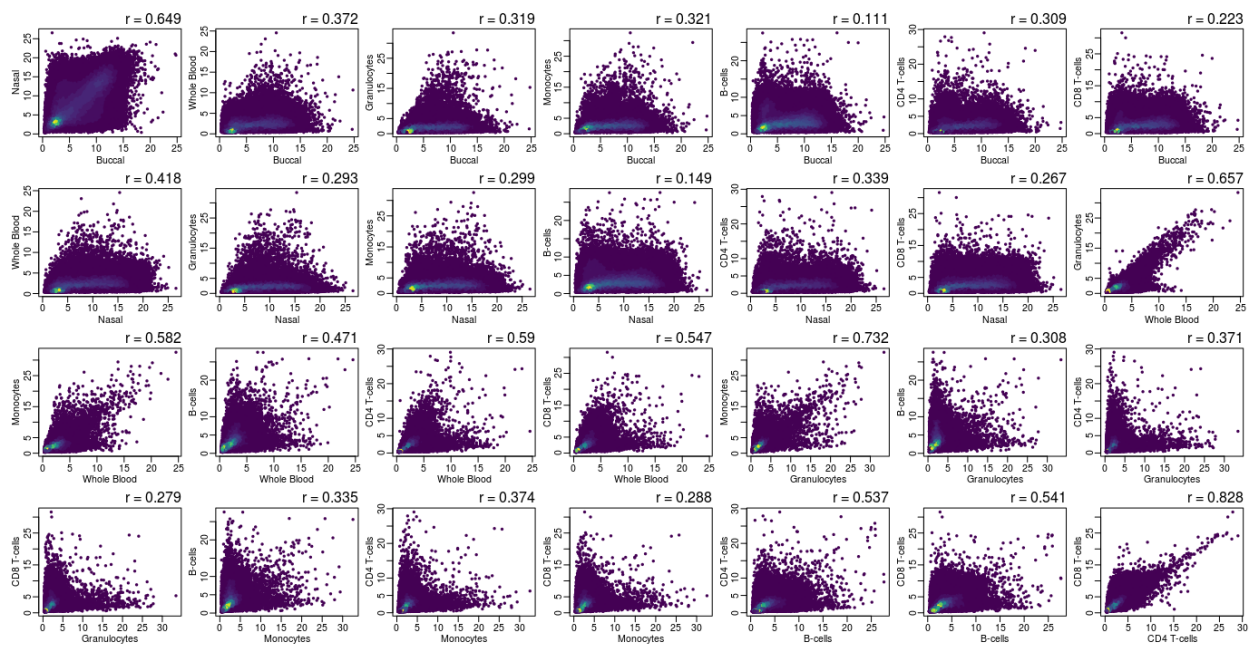

Supplement: pgen.1009443.s010.pdf [file pgen.1009443.s010.pdf]
