# Supplementary material for: Assessing the co-variability of DNA methylation across peripheral cells and tissues: Implications for the interpretation of findings in epigenetic epidemiology
Source: PubMed Central journal article supplement (PMC8011804; doi:10.1371/journal.pgen.1009443), 2021-03-19

**Figure S12. Inter-individual variation in DNA methylation in whole blood is correlated with variation in isolated blood cell types.** Histograms showing the distribution of correlation coefficients between DNA methylation in whole blood and the five blood cell types. **A) B-cells, B) CD4 T-cells, C) CD8 T-cells, D) monocytes and E) granulocytes.** The vertical blue dashed line indicates a correlation coefficient of zero. For all five cell types the distribution of correlation coefficients is skewed to the right.

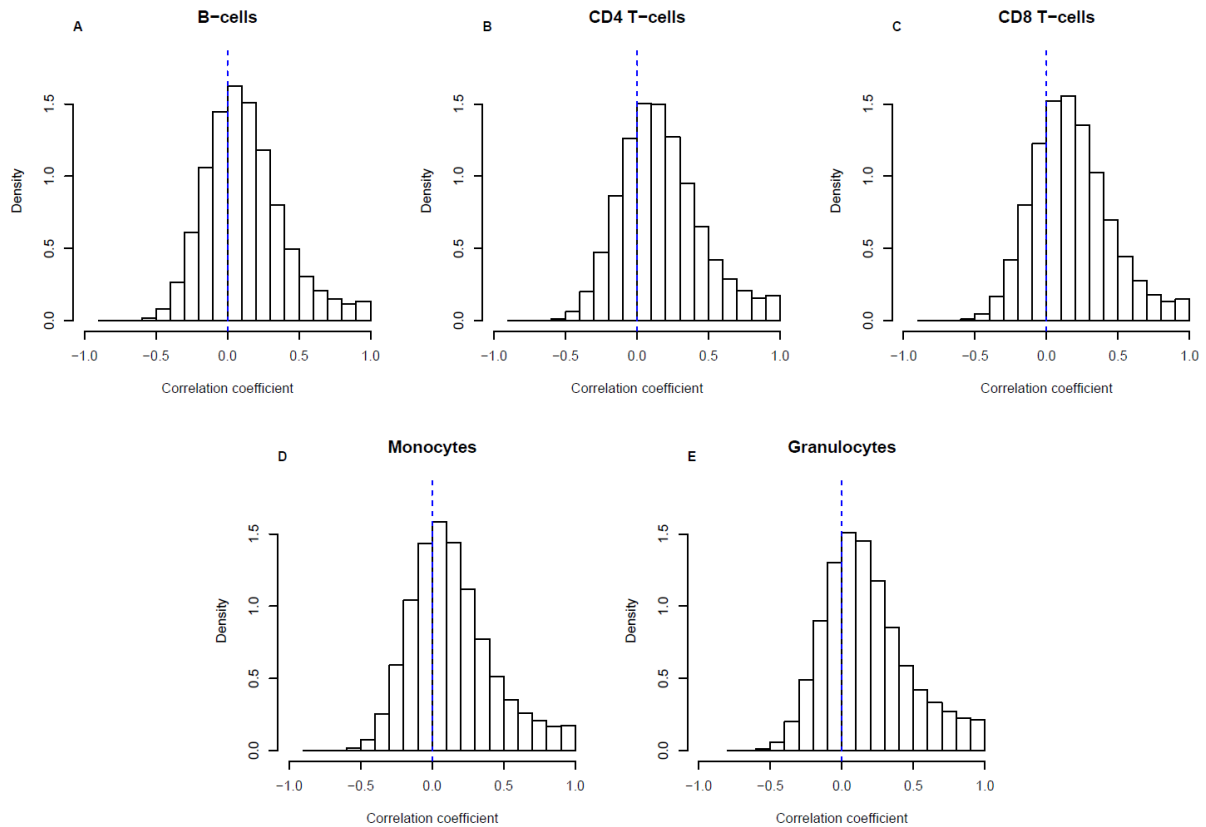

Supplement: pgen.1009443.s012.pdf [file pgen.1009443.s012.pdf]
