# Supplementary material for: Assessing the co-variability of DNA methylation across peripheral cells and tissues: Implications for the interpretation of findings in epigenetic epidemiology
Source: PubMed Central journal article supplement (PMC8011804; doi:10.1371/journal.pgen.1009443), 2021-03-19

**Figure S13. Covariation in DNA methylation between whole blood and individual blood cell-types is higher in the subset of DNAm sites classed as having ‘intermediate’ levels of DNAm or being highly ‘variable’.** Shown are boxplots of variance explained in whole blood for each cell type separately where DNAm sites are split by mean DNA methylation level (x-axis, left panels) and variability (right panels).

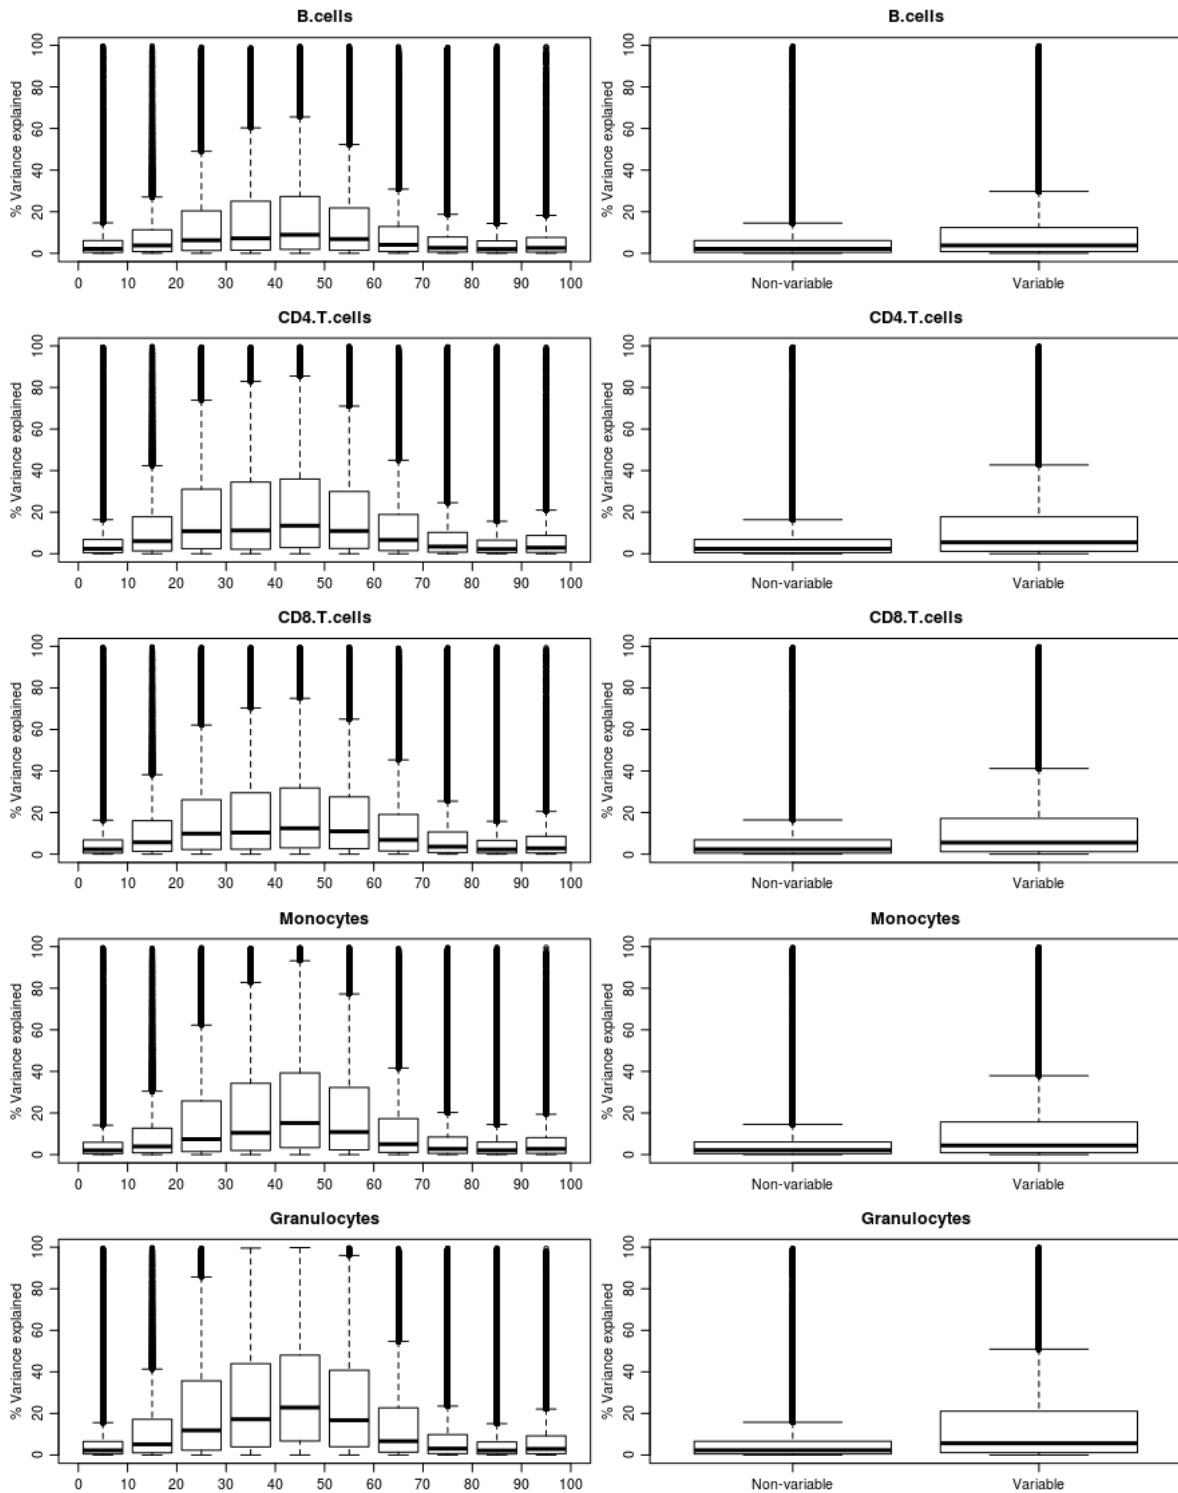

Supplement: pgen.1009443.s014.pdf [file pgen.1009443.s014.pdf]
