# Supplementary material for: Assessing the co-variability of DNA methylation across peripheral cells and tissues: Implications for the interpretation of findings in epigenetic epidemiology
Source: PubMed Central journal article supplement (PMC8011804; doi:10.1371/journal.pgen.1009443), 2021-03-19
Supplement: pgen.1009443.s016.pdf [file pgen.1009443.s016.pdf]

**Figure S16. Inter-individual variation in DNA methylation in whole blood is highly correlated with variation in isolated blood cell types for sites associated with an mQTL variant.** Histograms showing the distribution of correlation coefficients between DNA methylation in whole blood and the five blood cell types the subset of sites ( $n = 147,683$  sites) where whole blood DNAm is associated with an mQTL variant using data from Hannon et al[1]. **A) B-cells, B) CD4 T-cells, C) CD8 T-cells, D) monocytes and E) granulocytes.** The vertical blue dashed line indicates a correlation coefficient of zero. For all five cell types the distribution of correlation coefficients is skewed to the right.

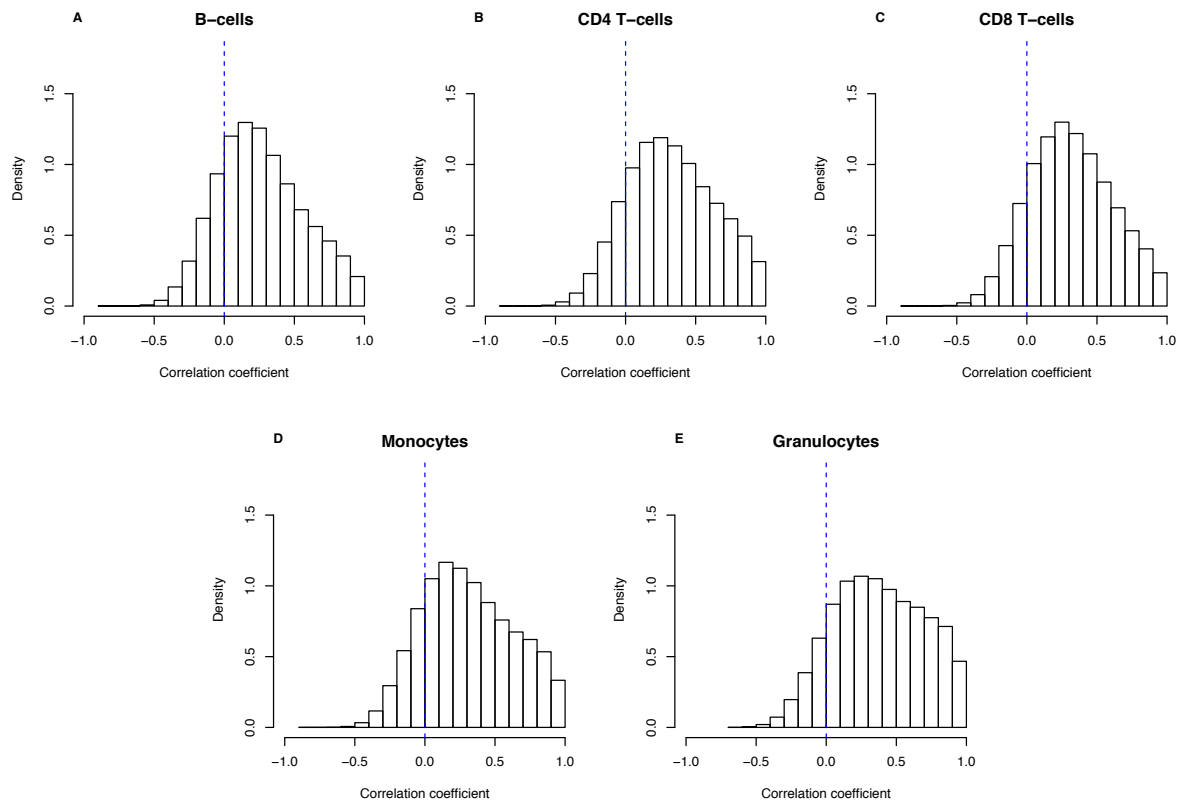

1. Hannon, E., et al., Leveraging DNA-Methylation Quantitative-Trait Loci to Characterize the Relationship between Methylomic Variation, Gene Expression, and Complex Traits. *Am J Hum Genet*, 2018. 103(5): p. 654-665.
