# Supplementary material for: Assessing the co-variability of DNA methylation across peripheral cells and tissues: Implications for the interpretation of findings in epigenetic epidemiology
Source: PubMed Central journal article supplement (PMC8011804; doi:10.1371/journal.pgen.1009443), 2021-03-19
Supplement: pgen.1009443.s017.pdf [file pgen.1009443.s017.pdf]

**Figure S17. Variation in DNA methylation in whole blood as a predictor of variation in the isolated blood cell types and other peripheral tissues across sites at which DNAm is associated with an mQTL variant.** Shown for the subset of sites ( $n = 147,683$  sites) where whole blood DNAm is associated with an mQTL variant using data from Hannon et al[1] is the proportion of sites (y-axis) for which variation in whole blood DNA methylation explains different levels of variance in five blood cell types (monocytes, granulocytes,  $CD4^+$  T cells,  $CD8^+$  T cells and B cells) isolated from the same individuals.

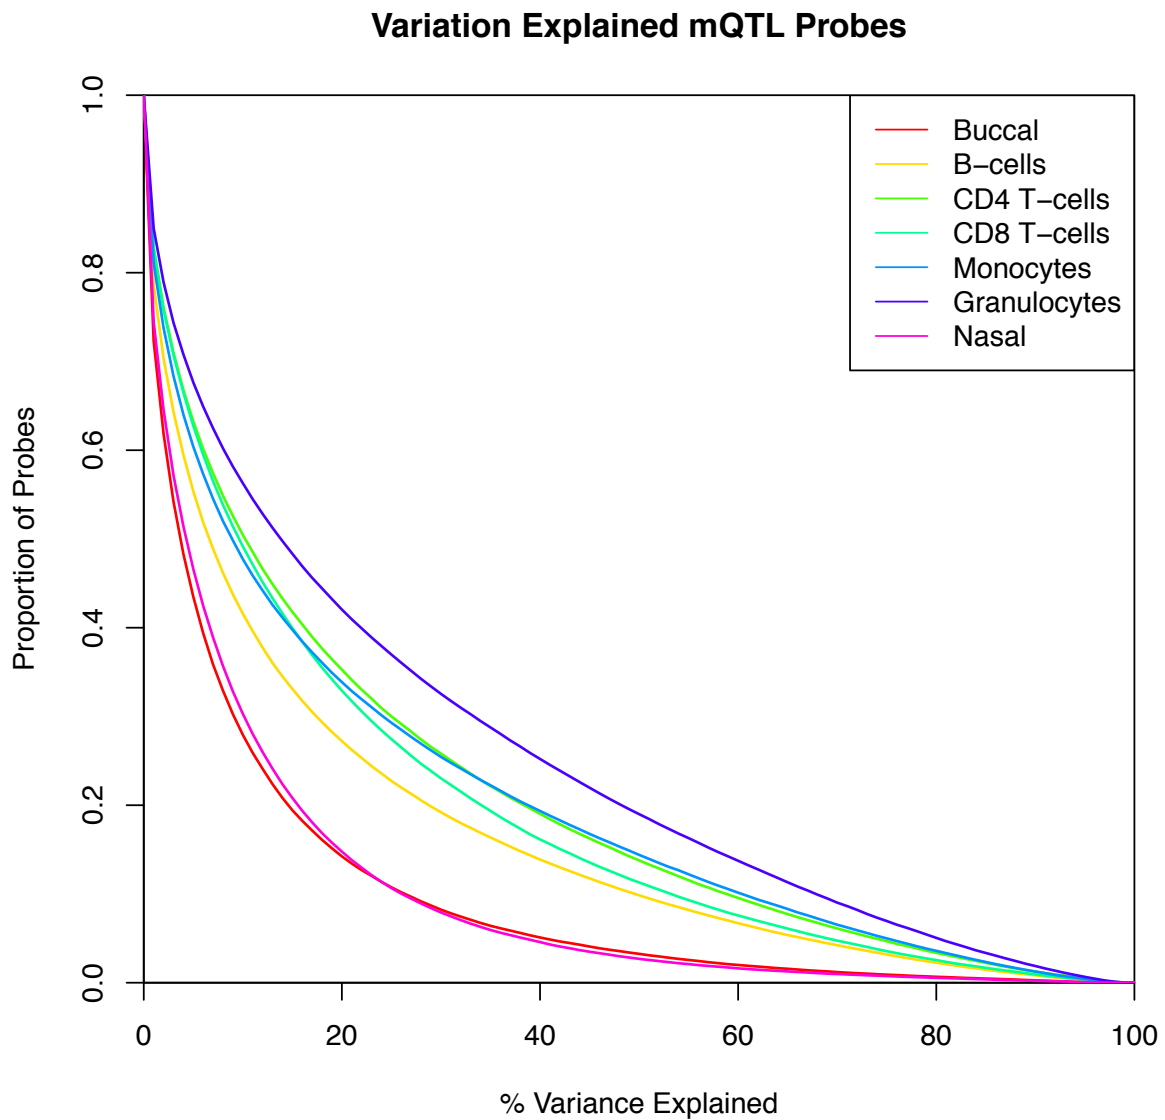

1. Hannon, E., et al., Leveraging DNA-Methylation Quantitative-Trait Loci to Characterize the Relationship between Methylomic Variation, Gene Expression, and Complex Traits. *Am J Hum Genet*, 2018. 103(5): p. 654-665.
