# Supplementary material for: Assessing the co-variability of DNA methylation across peripheral cells and tissues: Implications for the interpretation of findings in epigenetic epidemiology
Source: PubMed Central journal article supplement (PMC8011804; doi:10.1371/journal.pgen.1009443), 2021-03-19

**Figure S20. Inter-individual variation in different blood cell types predicts inter-individual variation in whole blood at the same sites.** Scatterplots comparing blood-cell type correlations between cell types. The colour of the point indicates the density of observations at that position ranging from gray (low) to yellow (high).

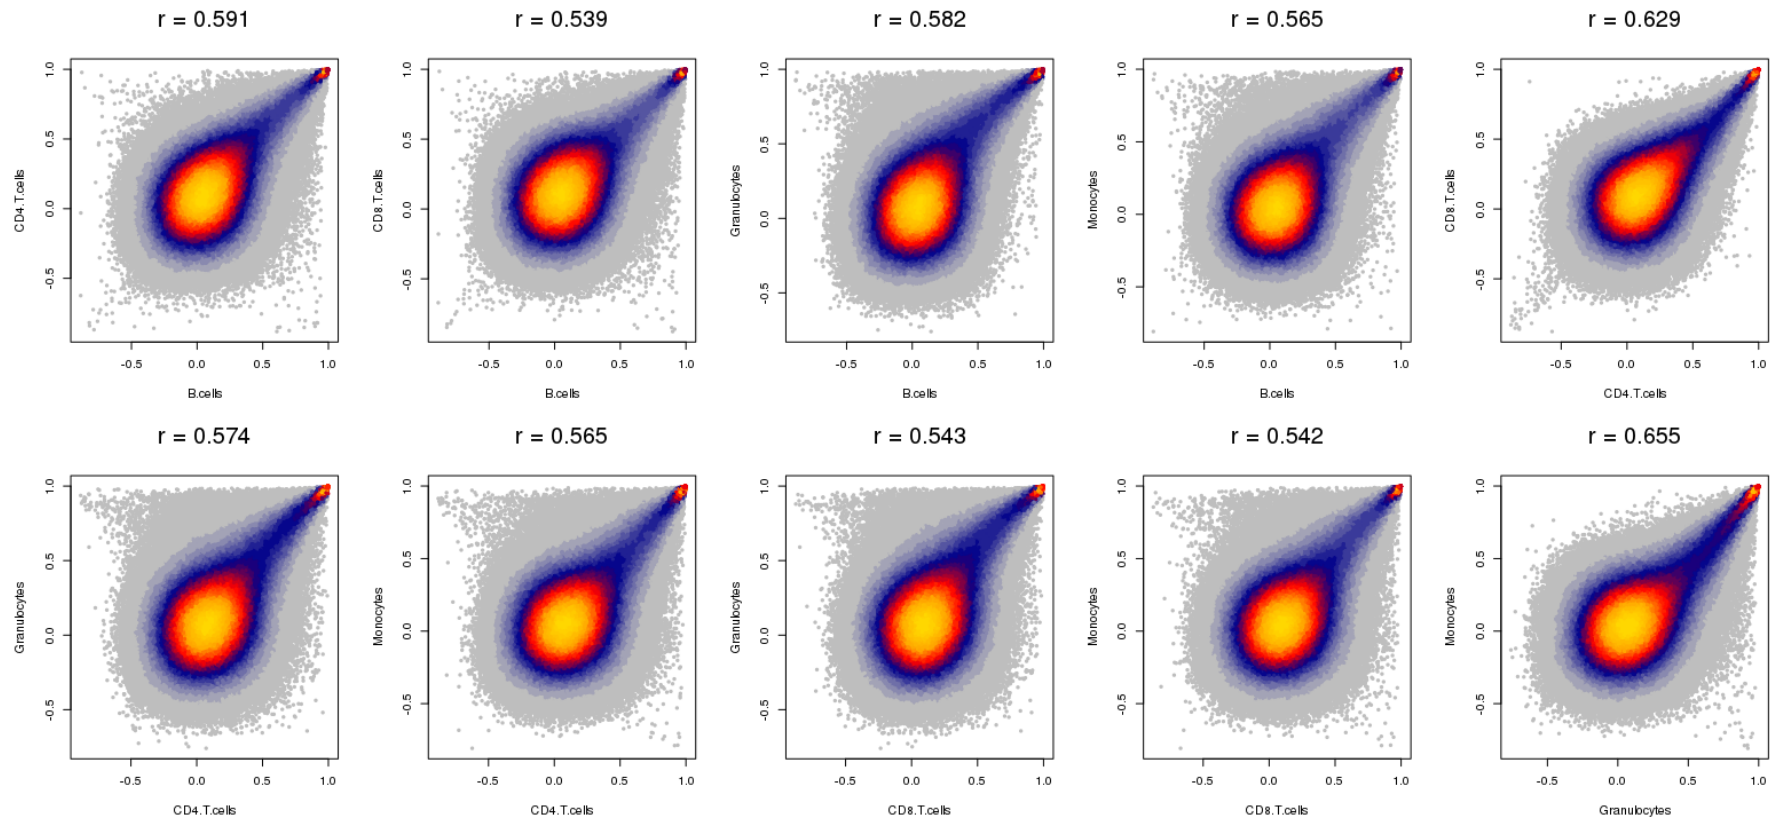

Supplement: pgen.1009443.s020.pdf [file pgen.1009443.s020.pdf]
