# Supplementary material for: Assessing the co-variability of DNA methylation across peripheral cells and tissues: Implications for the interpretation of findings in epigenetic epidemiology
Source: PubMed Central journal article supplement (PMC8011804; doi:10.1371/journal.pgen.1009443), 2021-03-19

**Figure S21. Histogram of variance explained in whole blood by all five cell types combined.**

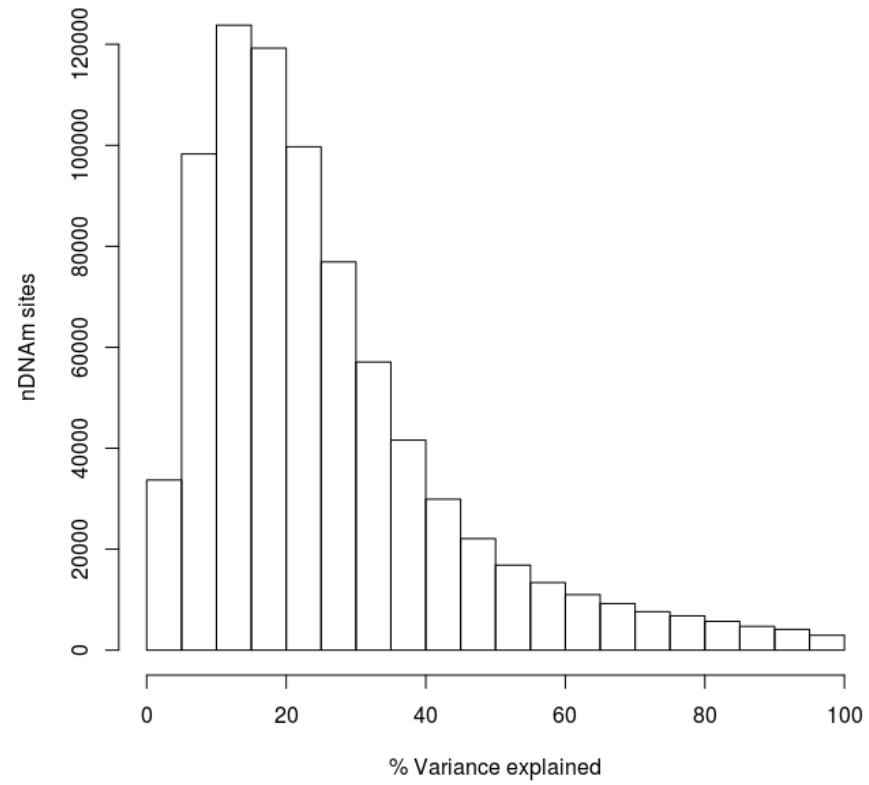

Supplement: pgen.1009443.s021.pdf [file pgen.1009443.s021.pdf]
