# Supplementary material for: Assessing the co-variability of DNA methylation across peripheral cells and tissues: Implications for the interpretation of findings in epigenetic epidemiology
Source: PubMed Central journal article supplement (PMC8011804; doi:10.1371/journal.pgen.1009443), 2021-03-19

**Figure S23. Histogram showing the number of individual blood cell types explaining at least 20% of the variance in DNA methylation in whole blood.**

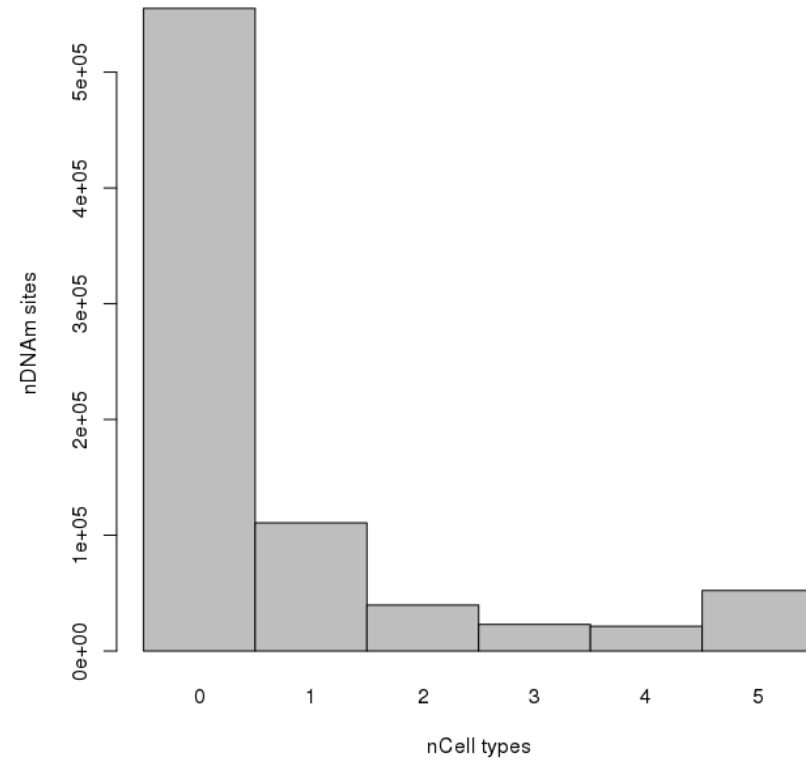

Supplement: pgen.1009443.s023.pdf [file pgen.1009443.s023.pdf]
