# Supplementary material for: Assessing the co-variability of DNA methylation across peripheral cells and tissues: Implications for the interpretation of findings in epigenetic epidemiology
Source: PubMed Central journal article supplement (PMC8011804; doi:10.1371/journal.pgen.1009443), 2021-03-19

**Figure S24. Heatmap showing the ratio of observed to expected number of characteristic sites for each blood cell type across DMPs associated with a range of traits.** Association results were downloaded from the EWAS catalog (<http://ewascatalog.org/>) and filtered to those identified in whole blood at a significance threshold of  $P < 1e-7$ . This heatmap contains all traits characterized by at least five significant associations that were characteristic of a blood cell type. Grey indicates that there was no characteristic sites for that cell type for that trait.

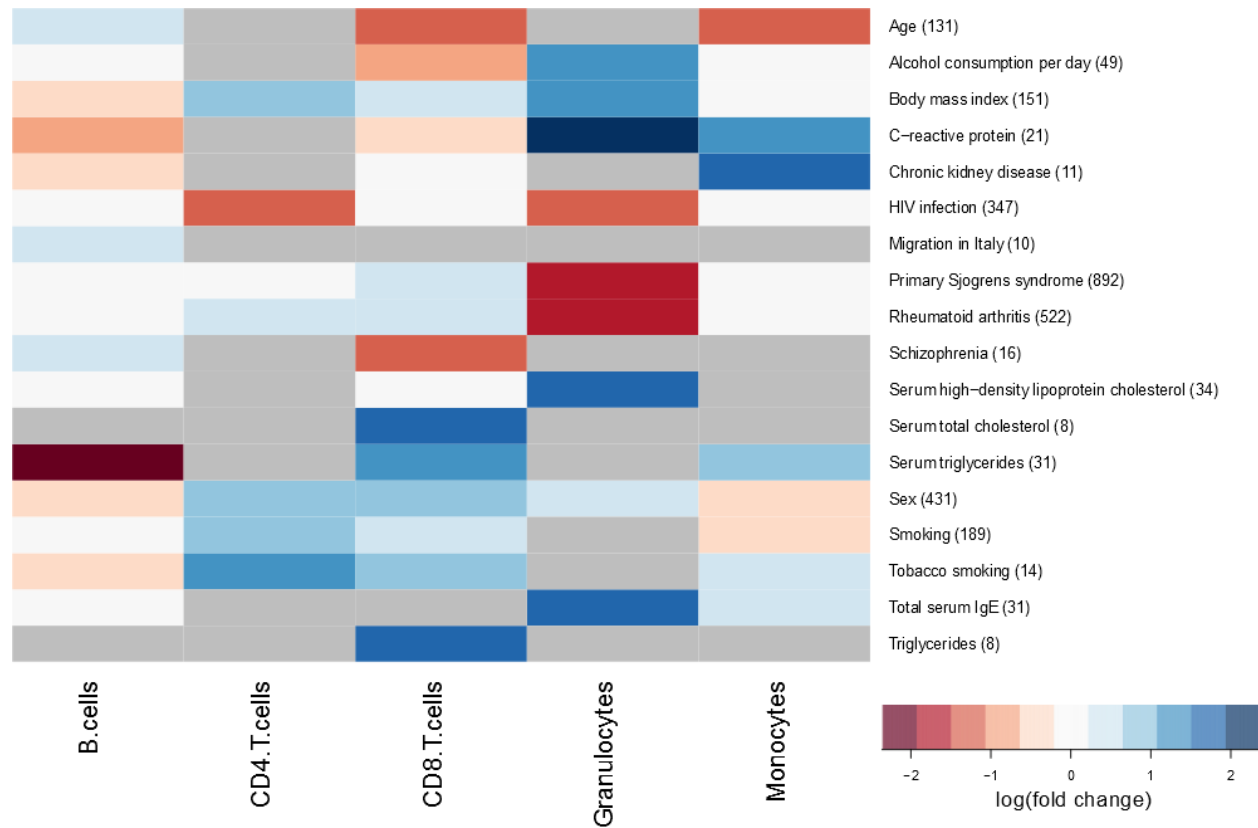

Supplement: pgen.1009443.s024.pdf [file pgen.1009443.s024.pdf]
